# Supplementary material
Source: publisher figshare collection journal article supplement (https://sage.figshare.com/ndownloader/files/15264245)
Supplement: Supplementary file 1 [file 15264245]

Supplemental Material for:

Premature Myocardial Infarction in the Middle East and North Africa: Rationale for the Gulf PREVENT Study

Supplemental Table 1: Countries within the Middle East and North Africa Region (MENA; categorized by the World Bank) and Eastern Mediterranean Region (EMR; categorized by the World Health Organization)

| <b>World Bank MENA<sup>1</sup></b><br>(n = 21) | <b>Global Burden of Disease Study MENA<sup>2</sup></b><br>(n = 21) | <b>Global Burden of Disease Study MENA<sup>3</sup></b><br>(n = 19) | <b>World Health Organization EMR<sup>4</sup></b><br>(n = 22) |
|------------------------------------------------|--------------------------------------------------------------------|--------------------------------------------------------------------|--------------------------------------------------------------|
| <b><i>Low Income</i></b>                       |                                                                    |                                                                    |                                                              |
| —                                              | Afghanistan                                                        | —                                                                  | Afghanistan                                                  |
| —                                              | —                                                                  | —                                                                  | Somalia                                                      |
| <b><i>Middle Income</i></b>                    |                                                                    |                                                                    |                                                              |
| Algeria                                        | Algeria                                                            | Algeria                                                            | —                                                            |
| Djibouti                                       | —                                                                  | —                                                                  | Djibouti                                                     |
| Arab Republic of Egypt                         | Arab Republic of Egypt                                             | Arab Republic of Egypt                                             | Arab Republic of Egypt                                       |
| Islamic Republic of Iran                       | Islamic Republic of Iran                                           | Islamic Republic of Iran                                           | Islamic Republic of Iran                                     |
| Iraq                                           | Iraq                                                               | Iraq                                                               | Iraq                                                         |
| Jordan                                         | Jordan                                                             | Jordan                                                             | Jordan                                                       |
| Lebanon                                        | Lebanon                                                            | Lebanon                                                            | Lebanon                                                      |
| Libya                                          | Libya                                                              | Libya                                                              | Libya                                                        |
| Morocco                                        | Morocco                                                            | Morocco                                                            | Morocco                                                      |
| —                                              | —                                                                  | —                                                                  | Pakistan                                                     |
| —                                              | Sudan                                                              | —                                                                  | Sudan                                                        |
| Syrian Arab Republic                           | Syria                                                              | Syrian Arab Republic                                               | Syria                                                        |
| Tunisia                                        | Tunisia                                                            | Tunisia                                                            | Tunisia                                                      |
| —                                              | Turkey                                                             | Turkey                                                             | —                                                            |
| Palestine                                      | Palestine                                                          | Palestine                                                          | Palestine                                                    |
| Republic of Yemen                              | Republic of Yemen                                                  | Republic of Yemen                                                  | Republic of Yemen                                            |
| <b><i>High Income</i></b>                      |                                                                    |                                                                    |                                                              |
| Bahrain                                        | Bahrain                                                            | Bahrain                                                            | Bahrain                                                      |
| Israel                                         | —                                                                  | —                                                                  | —                                                            |
| Kuwait                                         | Kuwait                                                             | Kuwait                                                             | Kuwait                                                       |

|                         |                         |                         |                         |
|-------------------------|-------------------------|-------------------------|-------------------------|
| Malta                   | —                       | —                       | —                       |
| Oman                    | Oman                    | Oman                    | Oman                    |
| Qatar                   | Qatar                   | Qatar                   | Qatar                   |
| Kingdom of Saudi Arabia |
| United Arab Emirates    | United Arab Emirates    | United Arab Emirates    | United Arab Emirates    |

Income groups (low, middle, and high) based on World Bank classification<sup>1</sup>. The 2017 World Bank MENA classification included Comoros and Sudan (both, low-income), Mauritania and Sudan (both, middle-income) but did not include Islamic Republic of Iran (middle-income), Israel and Malta (both, high-income).

Supplemental Table 2: Key data elements to be obtained and or measured in Gulf PREVENT

|                                     |                                                                                                                                                                                         |
|-------------------------------------|-----------------------------------------------------------------------------------------------------------------------------------------------------------------------------------------|
| Demographics                        | Age; nationality; marital status; education; employment                                                                                                                                 |
| Previous history                    | Medical conditions; tobacco use; medications; family history                                                                                                                            |
| Hospital presentation and outcomes  | Clinical presentation; diagnostics (including laboratory, cardiac imaging); therapies and interventions; hospital outcomes                                                              |
| Secondary cardiovascular prevention | Discharge medications; counselling on secondary prevention strategies; adherence to secondary prevention strategies; hospitalizations and cardiovascular events within 3-months post-MI |
| Laboratory parameters               | Basic metabolic panel; complete blood count; cardiac biomarkers; lipid biomarkers                                                                                                       |

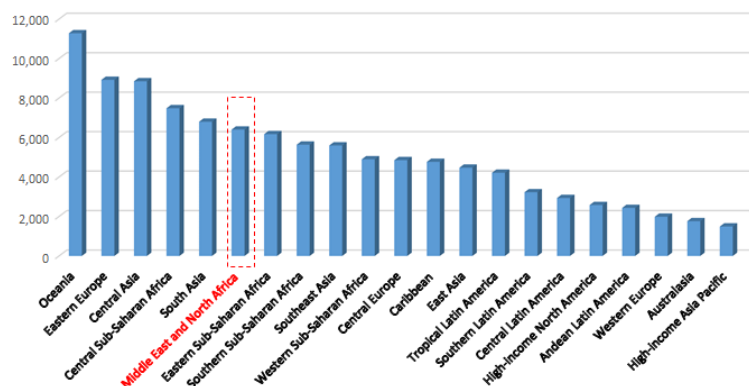

Supplemental Figure 1A: Age-standardized years of life lost (per 100,000) in 2015 attributed to cardiovascular disease. Data from Roth and colleagues.<sup>5</sup>

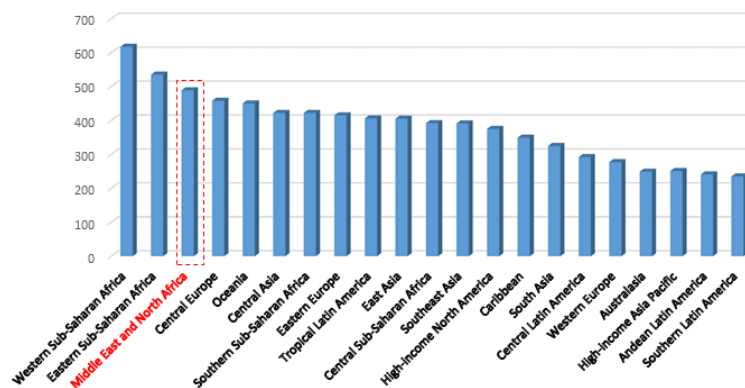

Supplemental Figure 1B: Age-standardized years lived with disability (per 100,000) in 2015 attributed to cardiovascular disease. Data from Roth and colleagues.<sup>5</sup>

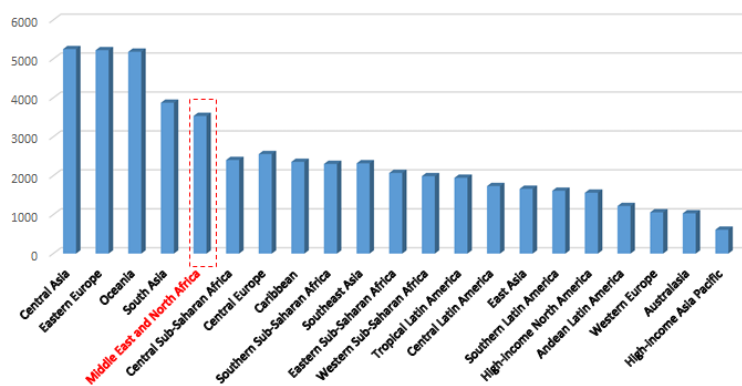

Supplemental Figure 1C: Age-standardized years of life lost (per 100,000) in 2015 attributed to ischemic heart disease. Data from Roth and colleagues.<sup>5</sup>

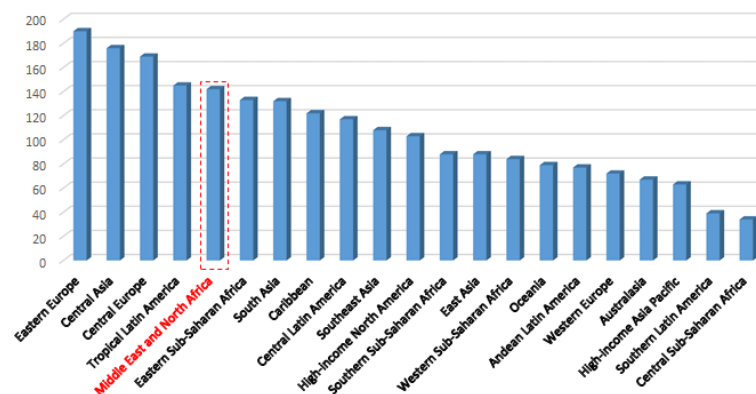

Supplemental Figure 1D: Age-standardized years lived with disability (per 100,000) in 2015 attributed to ischemic heart disease. Data from Roth and colleagues.<sup>5</sup>

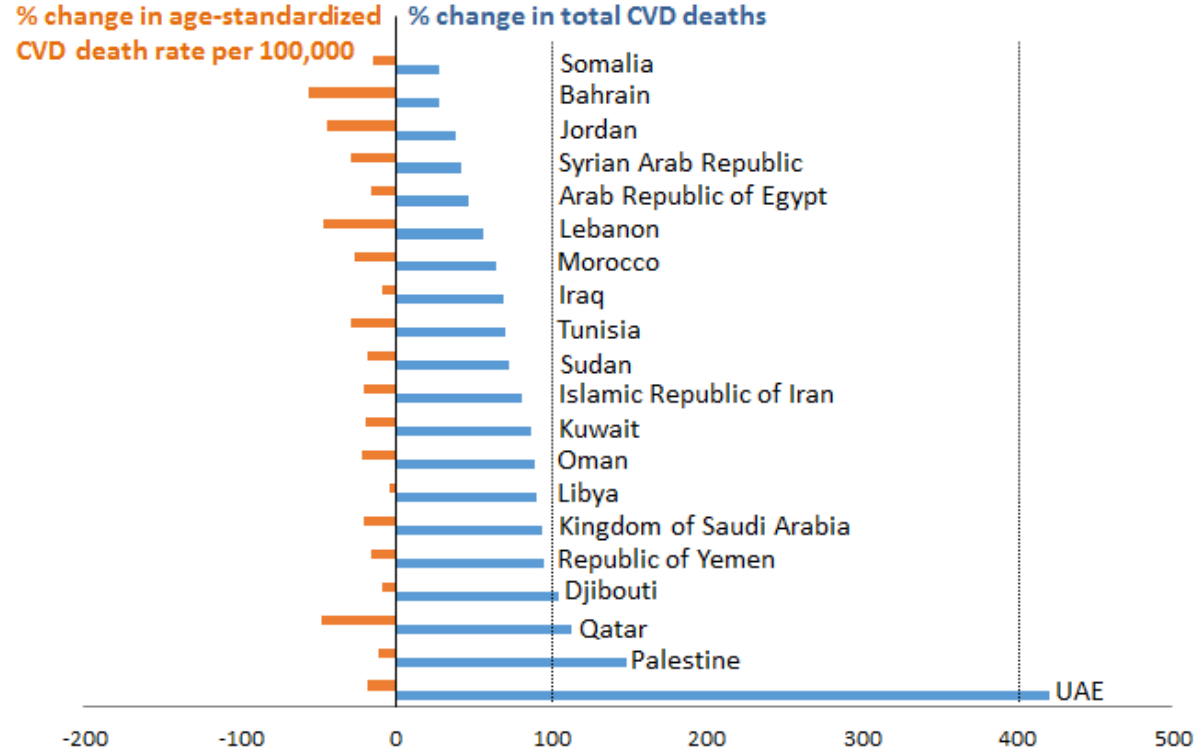

Supplemental Figure 2: Percentage change (2015 vs.1990) in age-standardized CVD death rate per 100,000 (orange bars) and in total CVD death (blue bars). Data from Mokdad and colleagues.<sup>4</sup> CVD: Cardiovascular disease; UAE: United Arab Emirates

## References

1. World Bank Group. World Bank country and lending groups. <https://data.worldbank.org/region/middle-east-and-north-africa?view=chart>. Published 2018. Accessed April 26, 2018.
2. GBD 2015 Mortality and Causes of Death Collaborators. Global, regional, and national life expectancy, all-cause mortality, and cause-specific mortality for 249 causes of death, 1980-2015: a systematic analysis for the Global Burden of Disease Study 2015. *Lancet (London, England)*. 2016;388(10053):1459-1544. doi:10.1016/S0140-6736(16)31012-1.
3. Moran AE, Forouzanfar MH, Roth GA, et al. Temporal trends in ischemic heart disease mortality in 21 world regions, 1980 to 2010: The Global Burden of Disease 2010 Study. *Circulation*. 2014;129(14):1483-1492. doi:10.1161/CIRCULATIONAHA.113.004042.
4. Mokdad AH, Mokdad AH. Burden of cardiovascular diseases in the Eastern Mediterranean Region, 1990–2015: findings from the Global Burden of Disease 2015 study. *Int J Public Health*. 2018;63(Suppl 1):137-149. doi:10.1007/s00038-017-1012-3.
5. Roth GA, Johnson C, Abajobir A, et al. Global, regional, and national burden of cardiovascular diseases for 10 causes, 1990 to 2015. *J Am Coll Cardiol*. 2017;70(1):1-25. doi:10.1016/j.jacc.2017.04.052.
